# Supplementary material
Source: PubMed Central journal article supplement (PMC4861661)
Supplement: NIHMS738591-supplement-supplement_1.pdf [file NIHMS738591-supplement-supplement_1.pdf]

**Supplementary Table: Clinical and pathological features of PSP-C patients**

|                           | <b>Patient 1</b>                                                             | <b>Patient 2</b>                                                  | <b>Patient 3</b>                                                        | <b>Patient 4</b>                                                    | <b>Patient 5</b>                            |
|---------------------------|------------------------------------------------------------------------------|-------------------------------------------------------------------|-------------------------------------------------------------------------|---------------------------------------------------------------------|---------------------------------------------|
| <b>Sex</b>                | Female                                                                       | Female                                                            | Male                                                                    | Male                                                                | Female                                      |
| <b>Age at onset</b>       | 62                                                                           | 74                                                                | 66                                                                      | 73                                                                  | 64                                          |
| <b>Age at death</b>       | 71                                                                           | 81                                                                | 74                                                                      | 79                                                                  | 82                                          |
| <b>Initial Sx</b>         | ataxic gait                                                                  | ataxic gait,<br>ataxic speech                                     | ataxic gait,<br>ataxic speech,<br>syncope                               | ataxic gait, CI                                                     | ataxic gait,<br>ataxic speech               |
| <b>Other Sx</b>           | limb ataxia, fall,<br>rigidity, VGP,<br>dysarthria, PS,<br>UI, dizziness, CI | limb ataxia, fall, SS,<br>parkinsonian gait,<br>PS, CI, dysphasia | limb ataxia, postural<br>instability, rigidity,<br>bradykinesia, PS, CI | limb ataxia,<br>rigidity, fall, SS,<br>dysarthria,<br>dysphasia, PS | limb ataxia, fall, SS,<br>UI, CI, dysphasia |
| <b>Initial Dx</b>         | Alcohol ataxia                                                               | MSA-C                                                             | MSA-C                                                                   | PN + AD                                                             | Vit.B12 deficiency                          |
| <b>Final Dx</b>           | MSA-C                                                                        | MSA-C                                                             | MSA-C                                                                   | PSP                                                                 | MSA-C                                       |
| <b>Pathologic Dx</b>      | PSP                                                                          | PSP/AGD                                                           | PSP                                                                     | PSP/AD/IOH                                                          | PSP/AGD/AD/CD                               |
| <b>Brain weight (g)</b>   | 1060                                                                         | 1140                                                              | 1280                                                                    | 1080                                                                | 1180                                        |
| <b>Braak NFT stage</b>    | 0                                                                            | 4                                                                 | 0                                                                       | 5                                                                   | 4                                           |
| <b>Thal amyloid phase</b> | 0                                                                            | 0                                                                 | 0                                                                       | 3                                                                   | 5                                           |

Abbreviations: PSP, progressive supranuclear palsy; PSP-C, PSP with predominant cerebellar ataxia; Sx, symptom; Dx, diagnosis; NFT, neurofibrillary tangles; VGP, vertical gaze palsy; PS, pyramidal signs; UI, urinary incontinence; CI, cognitive impairment; SS, slow saccades; MSA-C, multiple system atrophy with predominant cerebellar ataxia; PN, Peripheral neuropathy; Vit.B12, vitamin B12; AD, Alzheimer disease; AGD, argyrophilic grain disease; IOH, inferior olivary hypertrophy; CD, cerebellar degeneration.
